# Supplementary material
Source: HighWire-hosted journal article supplement (http://molpharm.aspetjournals.org/highwire/filestream/77158/field_highwire_adjunct_files/0/Supplementary_material.pdf)
Supplement: Supplementary_material.pdf [file Supplementary_material.pdf]

NMDA receptor activation down-regulates expression of  $\delta$  subunit-containing GABA<sub>A</sub>  
receptors in cultured hippocampal neurons

Suchitra Joshi and Jaideep Kapur

Department of Neurology, University of Virginia Health Sciences Center,  
Box 800394, Charlottesville, VA 22908-0394

Journal title: Molecular Pharmacology

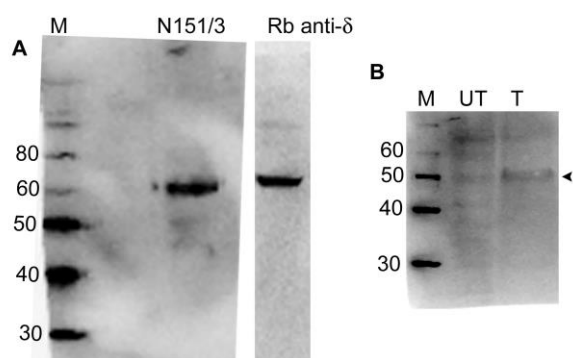

**Supplementary figure 1:** Characterization of mouse monoclonal anti- $\delta$  subunit antibody.

**A:** Comparison of reactivity of mouse monoclonal anti- $\delta$  subunit antibody (clone N151/3.3) and rabbit anti- $\delta$  subunit antibody (Millipore) in a Western blotting assay. Expression of  $\delta$  subunit was determined in 50  $\mu$ g of rat cerebellar proteins using 3  $\mu$ g/ml of anti- $\delta$  subunit antibody (N151/3.3) or 1:500 diluted rabbit anti- $\delta$  subunit antibody (Millipore). Both antibodies reacted with a single protein of approximate size 55 kDa corresponding with predicted size of the  $\delta$  subunit of GABARs. **B:** A representative Western blot demonstrating reactivity of anti- $\delta$  subunit antibody (N151/3.3) with 50  $\mu$ g proteins from HEK293 cells expressing rat  $\delta$  subunit (T). Proteins from untransfected (UT) cells were used as a control. Lane M shows standard molecular size marker.

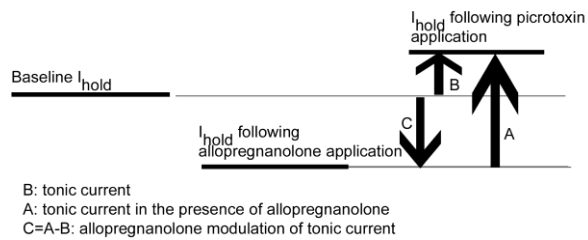

**Supplementary figure 2:** A schematic representation of measurement of tonic current and its neurosteroid modulation. Average pre-drug and post-drug holding currents were measured as described in the materials and methods. Tonic current was measured as the difference between pre-drug holding current and holding current following picrotoxin application (B). Allopregnanolone modulation of tonic current was the difference between pre-drug holding current and holding current following allopregnanolone application once a stable response was obtained (C).
